# Supplementary material for: NK-B cell cross talk induces CXCR5 expression on natural killer cells
Source: PubMed Central journal article supplement — iScience. 2021 Sep 9;24(10):103109. doi: 10.1016/j.isci.2021.103109 (PMC8479784; doi:10.1016/j.isci.2021.103109), 2021-09-09
Supplement: mmc1.pdf [file mmc1.pdf]

**iScience, Volume 24**

## **Supplemental information**

**NK-B cell cross talk induces**

**CXCR5 expression on natural killer cells**

**Philippe Rascle, Béatrice Jacquelin, Caroline Petitdemange, Vanessa Contreras, Cyril Planchais, Marie Lazzerini, Nathalie Dereuddre-Bosquet, Roger Le Grand, Hugo Mouquet, Nicolas Huot, and Michaela Müller-Trutwin**

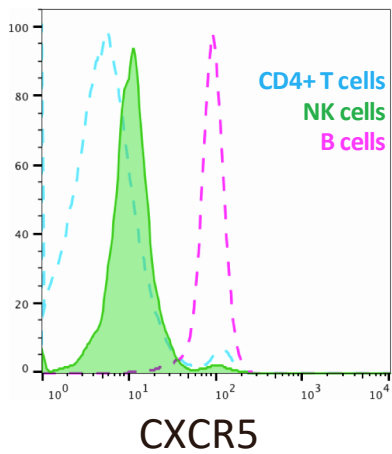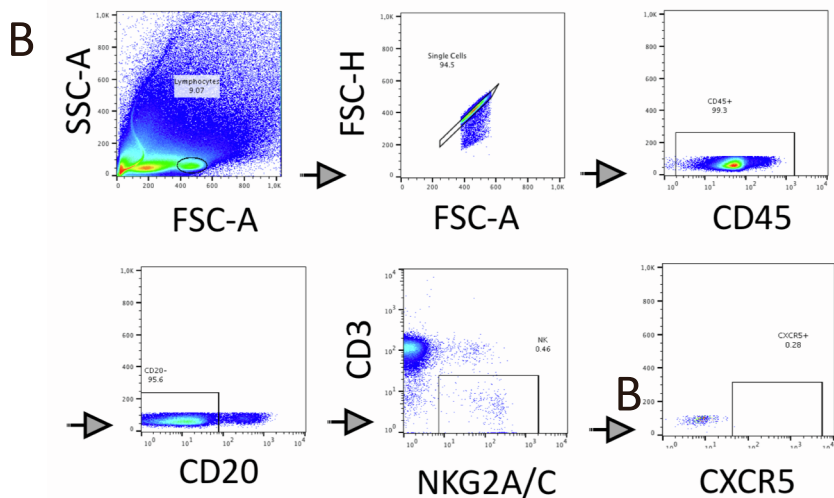

NK cells (AGM, pLN acute infection)

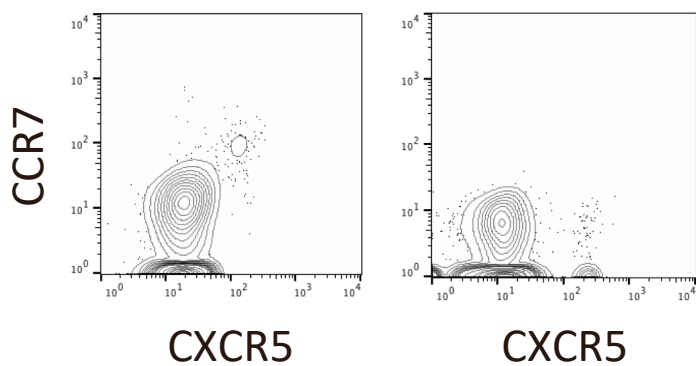

D

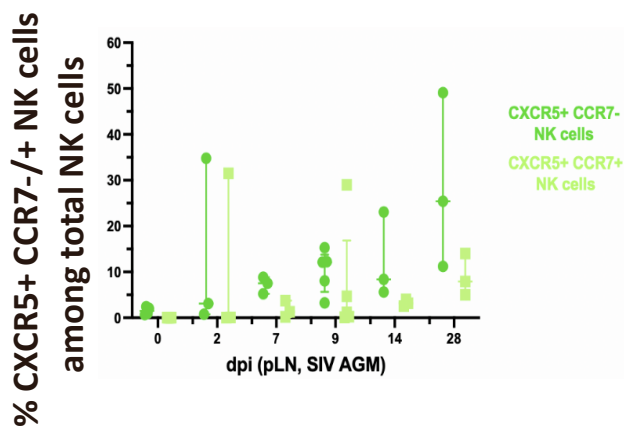

E

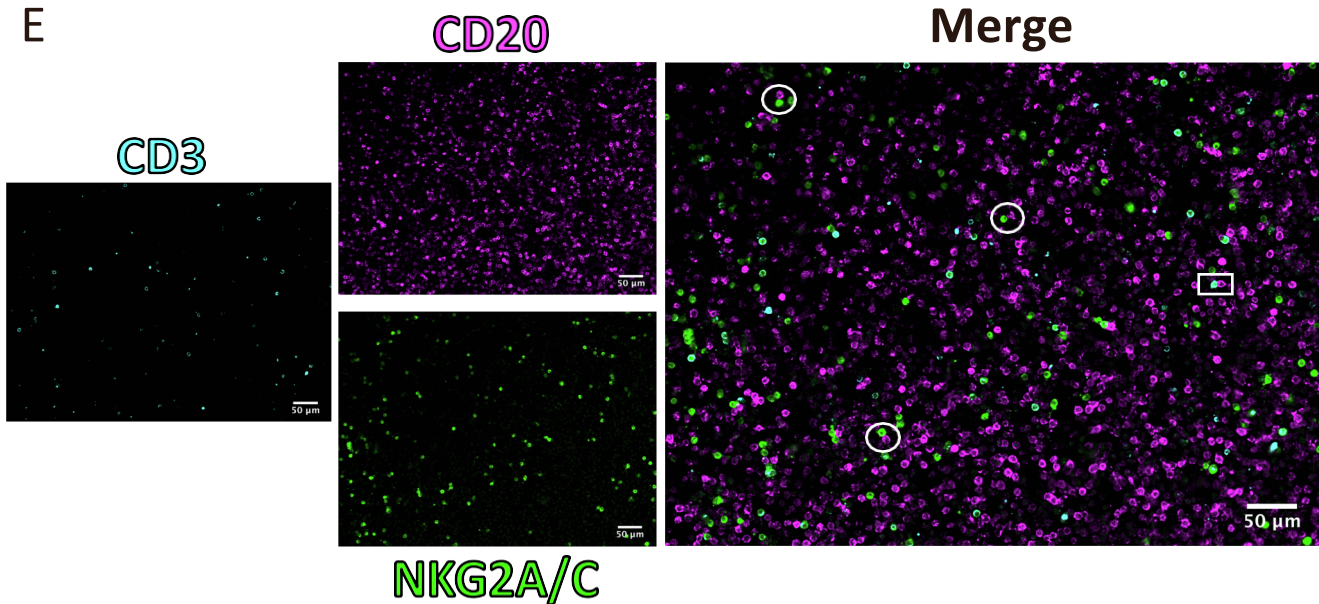

**Figure S1. Identification of CXCR5<sup>+</sup> NK cells, Related to Figure 1 and Figure 2.** **A)** Histogram of CXCR5 expression on CD4<sup>+</sup> T cells, B cells and NK cells from pLN in acute SIVagm infection. A representative animal is shown (AGM at day 9 p.i.). **B)** Gating strategy of CXCR5<sup>+</sup> NK cells in pLN from cynomolgus macaques. An example for cells from SIVmac-infected MAC at day 9 p.i. is shown. **C)** Dot plot of CXCR5<sup>+</sup>CCR7<sup>+</sup> and CXCR5<sup>+</sup>CCR7<sup>-</sup> NK cells in pLN from AGM during acute SIVagm infection (day 9 p.i.). **D)** Kinetic of CXCR5<sup>+</sup>CCR7<sup>-</sup> and CXCR5<sup>+</sup>CCR7<sup>+</sup> NK cell frequencies in pLN during primary SIVagm infection. Light green rectangles indicate CXCR5<sup>+</sup>CCR7<sup>+</sup> NK cells and dark green circles CXCR5<sup>+</sup>CCR7<sup>-</sup> NK cells. (n=3 AGM, except at day 9 pi where n=5). **E)** Analysis of contacts between NK and B cells. Cells were isolated from PBMC of non-infected AGM (n=3). NK cell marker in green, B cell in magenta and CD3 in cyan. The white circles delineate NK and B cells and the white square T and B cells. Each dot bar indicates median values, and error bars indicate interquartile ranges.

A

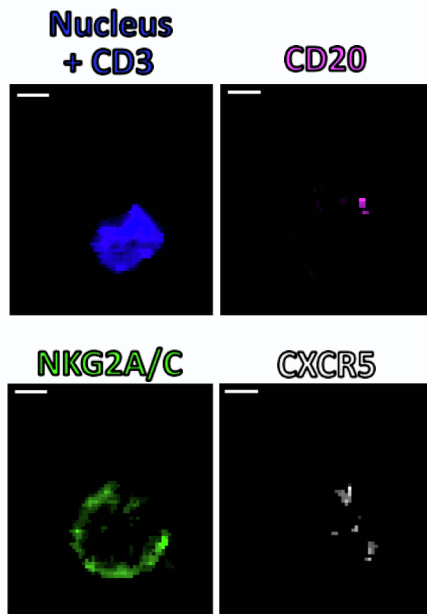

B

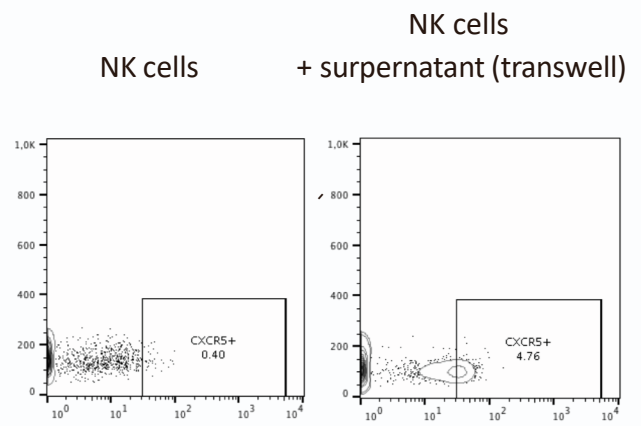

C

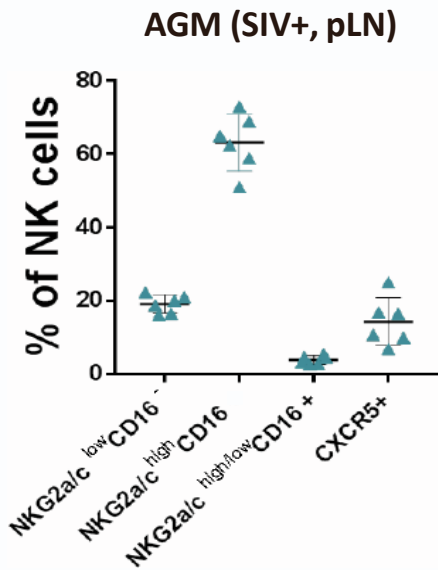

D

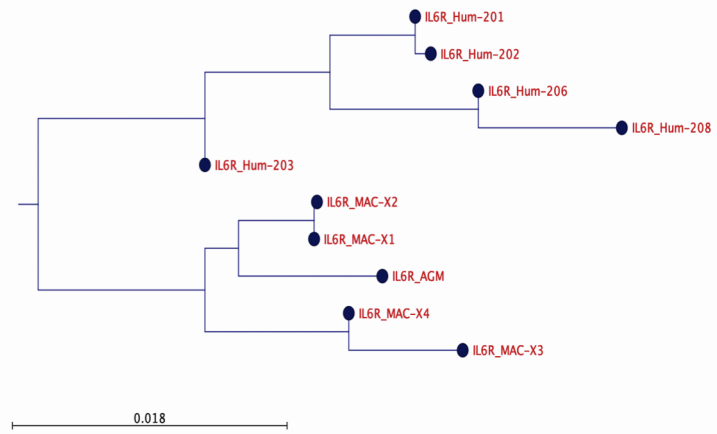

E

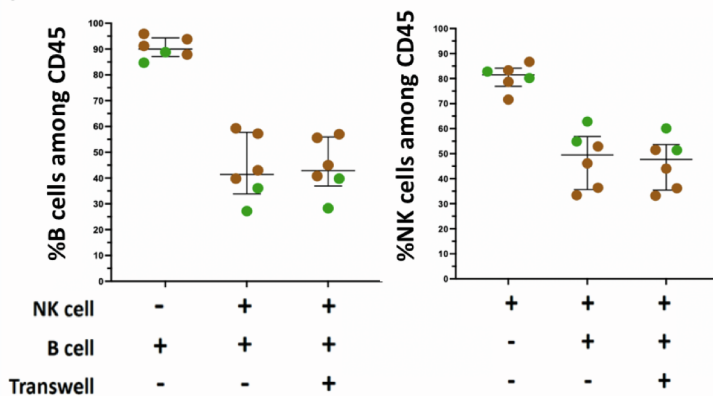

F

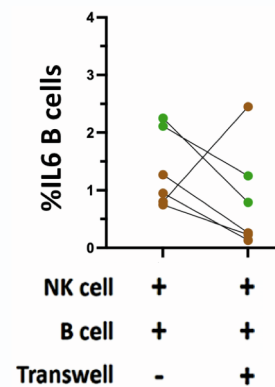

**Figure S2. *In vitro* and *in vivo* NK cell population, Related to Figure 2 and Figure 3.** **A)** Staining of NK cells after 1 day of culture. NK cell marker in green, B cell marker in magenta, Nucleus and CD3 in cyan, CXCR5 in grey. Scale bare upper left correspond to 2 micrometers. **B)** Dot plot representative of CXCR5<sup>+</sup> NK cells from AGM after culture with the supernatant of NK-B cell cocultures in transwell chambers. **C)** Frequencies of NK cell subpopulations in pLN of chronically SIVagm-infected AGM (n=6 AGM). **D)** Phylogenetic analysis of IL6R genes (variants) was performed for human, macaque and AGM species in phylogram representation (the ladder is in number of substitution/sites). **E)** Percentage of B cells and NK cells. **F)** IL-6<sup>+</sup> B cells after co- culture with autologous cells or co-culture with autologous cells separated by a transwell membrane. B and NK cells were isolated from PBMC of uninfected AGMs (n= 2, green) and MACs (n=4, brown). Non-significative differences (n=6, Wilcoxon test). Each dot bar indicates median values, and error bars indicate interquartile ranges.

A

MAC (pLN; acute)

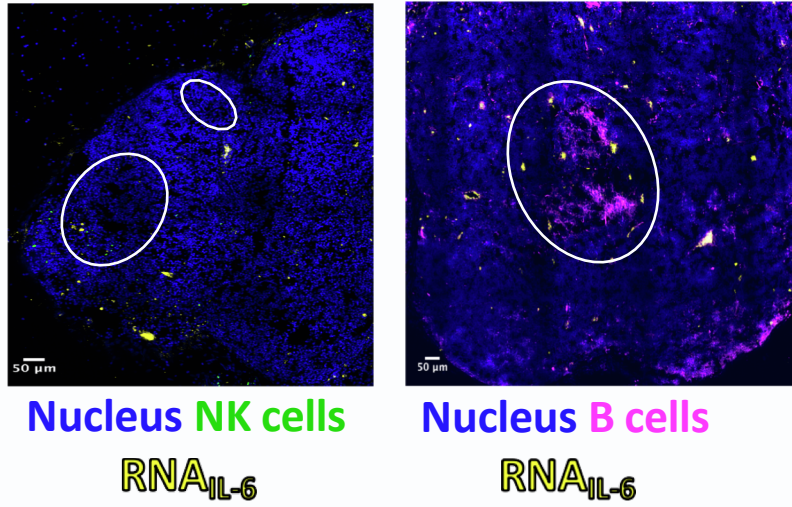

B

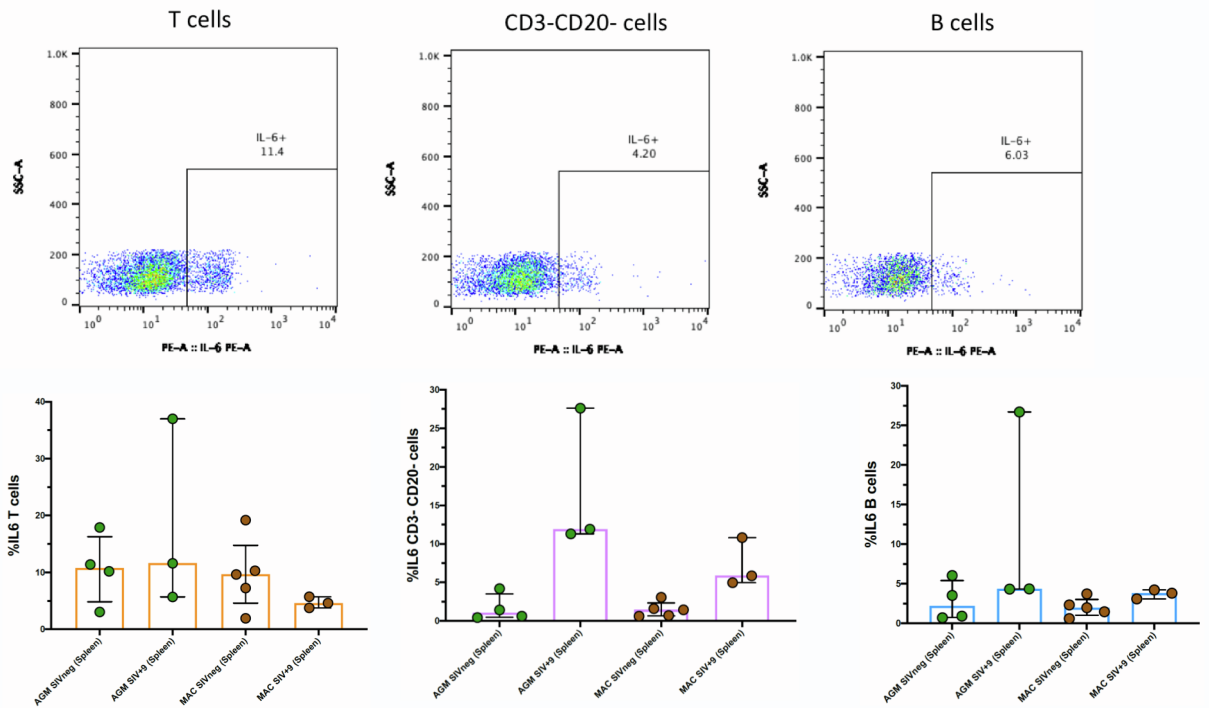

**Figure S3. In situ and ex vivo IL-6 production in secondary lymphoid organs, Related to Figure 4 and Figure 5.** **A)** *IL-6* mRNA expression in pLN from MAC during acute SIVmac infection (at day 9 p.i.) analyzed by microscopy. Representative B follicles are shown. NK cell marker in green, B cell marker in magenta,  $RNA_{IL-6}$  in yellow and nucleus in blue (n=3 MAC). **B)** Analysis of ex vivo IL-6 expression by flow cytometry. Upper panel: Dot plot representative of IL-6 intracellular *ex vivo* staining in T cells (CD3<sup>+</sup>), B cells (CD20<sup>+</sup>) and CD3<sup>-</sup>CD20<sup>-</sup> cells from spleen. Lower panel: Frequencies detected in uninfected and acutely (day 9 p.i.) SIVagm and SIV mac infected animals. Each circle indicates an individual animal. Green: AGM, brown: macaque. Each dot bar indicates median values, and error bars indicate interquartile ranges.

| Animal # | Species             | Gender | Age at inclusion (years) | SIV Negative infection | SIV Acute infection (vRNA, copies/mL plasma) | SIV Chronic infection (vRNA, copies/mL plasma) |
|----------|---------------------|--------|--------------------------|------------------------|----------------------------------------------|------------------------------------------------|
| AGM01    | Chlorocebus sabaeus | Female | 10,3                     |                        | 2,00E+07                                     |                                                |
| AGM02    | Chlorocebus sabaeus | Male   | 5,0                      |                        | 1,30E+07                                     | 1,20E+04                                       |
| AGM03    | Chlorocebus sabaeus | Female | 5,0                      |                        | 1,30E+07                                     | 1,20E+04                                       |
| AGM04    | Chlorocebus sabaeus | Female | 6,0                      |                        | 8,20E+06                                     | 1,20E+04                                       |
| AGM05    | Chlorocebus sabaeus | Female | 5,2                      |                        | 3,60E+08                                     | 2,30E+04                                       |
| AGM06    | Chlorocebus sabaeus | Male   | 4,3                      |                        | 3,60E+08                                     | 2,50E+04                                       |
| AGM07    | Chlorocebus sabaeus | Female | 5,2                      |                        | 2,80E+08                                     | 5,60E+04                                       |
| AGM08    | Chlorocebus sabaeus | Male   | 6,6                      |                        |                                              | 5,00E+05                                       |
| AGM09    | Chlorocebus sabaeus | Male   | 4,4                      | n.a.                   |                                              |                                                |
| AGM10    | Chlorocebus sabaeus | Male   | 6,2                      | n.a.                   | 3,50E+06                                     |                                                |
| AGM11    | Chlorocebus sabaeus | Male   | 6,6                      | n.a.                   |                                              | 1,30E+06                                       |
| AGM12    | Chlorocebus sabaeus | Male   | 5,2                      |                        |                                              | 1,90E+06                                       |
| AGM13    | Chlorocebus sabaeus | Male   | 6,2                      |                        | 7,70E+05                                     |                                                |
| AGM14    | Chlorocebus sabaeus | Male   | 6,4                      | n.a.                   |                                              |                                                |
| AGM15    | Chlorocebus sabaeus | Male   | 4,0                      | n.a.                   |                                              |                                                |
| AGM16    | Chlorocebus sabaeus | Female | 7,0                      | n.a.                   |                                              |                                                |
| AGM17    | Chlorocebus sabaeus | Male   | 5,1                      | n.a.                   |                                              |                                                |
| AGM18    | Chlorocebus sabaeus | Male   | 4,5                      | n.a.                   |                                              |                                                |
| AGM19    | Chlorocebus sabaeus | Female | 5,2                      | n.a.                   |                                              |                                                |
| MAC01    | Macaca fascicularis | Male   | 6,5                      | n.a.                   |                                              |                                                |
| MAC02    | Macaca fascicularis | Male   | 8,0                      | n.a.                   |                                              |                                                |
| MAC03    | Macaca fascicularis | Male   | 7,8                      | n.a.                   |                                              |                                                |
| MAC04    | Macaca fascicularis | Male   | 6,4                      | n.a.                   |                                              |                                                |
| MAC05    | Macaca fascicularis | Male   | 6,9                      | n.a.                   |                                              |                                                |
| MAC06    | Macaca fascicularis | Male   | 7,6                      | n.a.                   |                                              |                                                |
| MAC07    | Macaca fascicularis | Male   | 8,5                      | n.a.                   |                                              |                                                |
| MAC08    | Macaca fascicularis | Male   | 9,9                      | n.a.                   |                                              |                                                |
| MAC09    | Macaca fascicularis | Female | 8,4                      | n.a.                   |                                              |                                                |
| MAC10    | Macaca fascicularis | Female | 3,8                      |                        | 5,60E+06                                     | 2,50E+04                                       |
| MAC11    | Macaca fascicularis | Female | 3,8                      |                        | 2,00E+06                                     | 2,60E+04                                       |
| MAC12    | Macaca fascicularis | Female | 3,8                      |                        | 3,00E+06                                     | 3,30E+04                                       |
| MAC13    | Macaca fascicularis | Male   | 2,6                      |                        | 2,00E+06                                     | 2,50E+06                                       |
| MAC14    | Macaca fascicularis | Male   | 8,6                      | n.a.                   |                                              |                                                |
| MAC15    | Macaca fascicularis | Male   | 8,4                      | n.a.                   |                                              |                                                |
| MAC16    | Macaca fascicularis | Male   | 5,7                      | n.a.                   |                                              |                                                |
| MAC17    | Macaca fascicularis | Female | 3,3                      |                        | 1,90E+06                                     |                                                |
| MAC18    | Macaca fascicularis | Male   | 3,1                      |                        | 9,90E+05                                     |                                                |
| MAC19    | Macaca fascicularis | Male   | 3,1                      |                        | 1,20E+06                                     |                                                |
| MAC20    | Macaca fascicularis | Female | 3,1                      |                        | 2,00E+06                                     | 1,50E+03                                       |
| MAC21    | Macaca fascicularis | Male   | 2,6                      |                        | 2,10E+07                                     | 2,20E+03                                       |
| MAC22    | Macaca fascicularis | Female | 5,6                      | n.a.                   |                                              |                                                |
| MAC23    | Macaca fascicularis | Female | 5,0                      | n.a.                   |                                              |                                                |
| MAC24    | Macaca fascicularis | Female | 7,2                      | n.a.                   |                                              |                                                |
| MAC25    | Macaca fascicularis | Female | 8,4                      | n.a.                   |                                              |                                                |
| MAC26    | Macaca fascicularis | Female | 8,8                      | n.a.                   |                                              |                                                |
| MAC27    | Macaca fascicularis | Male   | 3,6                      |                        |                                              | 1,45E+05                                       |
| MAC28    | Macaca fascicularis | Male   | 5,3                      |                        |                                              | 4,58E+02                                       |

**Table S1. Profile of non-human primates used for this study, Related to Figure 1-5.** Description of species, gender, plasma viremia levels corresponding at the different time points (n.a: not applicable).



| LSR II  | Name       | Fluorochrome | Clone       | Isotype | Supplier         | Reference  | Antibody dilution used per 10 <sup>6</sup> cells |
|---------|------------|--------------|-------------|---------|------------------|------------|--------------------------------------------------|
|         | CD45       | PerCP        | D058-1283   | IgG1    | BD               | 558411     | 1:20                                             |
|         | CD3        | V500         | SP34-2      | IgG1    | BD               | 560770     | 1:20                                             |
|         | CD16       | ECD          | 3G8         | IgG1    | Beckman          | A33098     | 1:20                                             |
|         | NKG2A      | PE           | Z199        | IgG2    | Beckman          | PNA60797   | 1:20                                             |
|         | CD20       | PE-Cy5       | 2H7         | IgG1    | BD               | 555624     | 1:10                                             |
|         | Granzyme B | V450         | GB11        | IgG1    | BD               | 561151     | 1:20                                             |
|         | CXCR5      | FITC         | MU5UBEE     | IgG1    | MABTech          | 11-9185-42 | 1:5                                              |
|         | PD-1       | APC-Cy7      | EH12.2H7    | IgG1    | Biolegend        | 329922     | 1:10                                             |
|         | CD4        | V450         | L200        | IgG1    | BD               | 560811     | 1:10                                             |
|         | MHC-E      | PE           | 3D12        | IgG1    | Biolegend        | 342603     | 1:10                                             |
|         | HLA-DR     | Alexa 700    | L243        | IgG1    | OZYME            | 307626     | 1:20                                             |
|         | IFNg       | APC          | B27         | IgG1    | BD               | 554702     | 1:20                                             |
|         | IL-10      | PE-Cy7       | JES3-9D1    | IgG1    | Biolegend        | 501420     | 1:5                                              |
|         | IL6        | PE           | MQ2-6A3     | IgG2a   | BD               | 559331     | 1:5                                              |
|         | CD8        | APC-Cy7      | 130-113-155 | IgG2a   | Miltenyi         | BW135/80   | 1:10                                             |
|         | CD3        | V450         | SP34-2      | IgG1    | BD               | 560770     | 1:20                                             |
|         | CD20       | Alexa 700    | 2H7         | IgG1    | BD               | 560631     | 1:10                                             |
|         | IgD        | ECD          | polyclonal  | IgG1    | Southern Biotech | 2030-07    | 1:5                                              |
|         | CD27       | PE-Cy7       | M-T271      | IgG1    | BD               | 560609     | 1:5                                              |
|         | CD107a     | PE-Cy5       | H4A3        | IgG1    | BD               | 555802     | 1:5                                              |
|         | IgG        | FITC         | G18-145     | IgG1    | BD               | 555786     | 1:10                                             |
|         | IgM        | PE-Cy5       | G20-127     | IgG1    | BD               | 562031     | 1:20                                             |
|         | Ki67       | PE           | B56         | IgG1    | BD               | 556027     | 1:5                                              |
| Aria II |            |              |             |         |                  |            |                                                  |
|         | CD45       | PerCP        | D058-1283   | IgG1    | BD               | 558411     | 1:20                                             |
|         | CD3        | V500         | SP34-2      | IgG1    | BD               | 560770     | 1:20                                             |
|         | CD16       | ECD          | 3G8         | IgG1    | Beckman          | A33098     | 1:20                                             |
|         | NKG2A      | PE           | Z199        | IgG2    | Beckman          | PNA60797   | 1:20                                             |
|         | CD8        | APC-Cy7      | 130-113-158 | IgG2a   | Miltenyi         | BW135/80   | 1:10                                             |
|         | CD20       | Alexa 700    | 2H7         | IgG1    | BD               | 560631     | 1:10                                             |
|         | CD14       | PE           | M5E2        | IgG2a   | BD               | 557154     | 1:10                                             |
|         | CXCR5      | FITC         | MU5UBEE     | IgG1    | MABTech          | 11-9185-42 | 1:5                                              |

**Table S2. Flow cytometry antibody list, Related to Figure 1-5.** Antibodies used to stain NK cells and B cells by flow cytometry using LSR II and antibodies used to stain NK cells during cell sorting by Aria II.

| In situ  | Name                | Fluorochrome   | Clone      | Isotype     | Supplier    | Reference  |
|----------|---------------------|----------------|------------|-------------|-------------|------------|
|          | Anti-NKG2A          | n.a            | Polyclonal | IgG-Rabbit  | Abcam       | ab170844   |
|          | Anti-Ki67           | n.a            | MIB-1      | IgG1-Mouse  | Santa Cruz  | sc-101861  |
|          | Anti-CD20           | n.a            | L26        | IgG2a-Mouse | Cell Marque | 120M-84    |
|          | Anti-CD138          | n.a            | MI15       | IgG1k-Mouse | Biologend   | 356501     |
|          | Nucleus             | DAPI           | n.a        | n.a         | Sigma       | D9542-10MG |
|          | Anti-Mouse IgG2a    | AlexaFluor 568 | Polyclonal | IgG-Goat    | Invitrogen  | A-21134    |
|          | Anti-Mouse IgG H&L  | AlexaFluor 568 | Polyclonal | IgG-Donkey  | Abcam       | ab175472   |
|          | Anti-Rabbit IgG H&L | AlexaFluor 488 | Polyclonal | IgG-Donkey  | Abcam       | ab150061   |
| In vitro | Name                | Fluorochrome   | Clone      | Isotype     | Supplier    | Reference  |
|          | NKG2A               | APC            | Z199       | IgG2        | Beckman     | PNA60797   |
|          | CD20                | FITC           | 2H7        | IgG1        | BD          | 560631     |
|          | CD3                 | V450           | SP34-2     | IgG1        | BD          | 560770     |
|          | CD20                | Alexa 700      | 2H7        | IgG1        | BD          | 560631     |
|          | CXCR5               | FITC           | MU5UBEE    | IgG1        | MABTech     | 11-9185-42 |
|          | Nucleus             | DAPI           | n.a        | n.a         | Sigma       | D9542-10MG |

**Table S3. Microscopy antibody list, Related to Figure 1-5.** Antibodies used to stain NK cells and B cells by microscopy in *in situ* and *in vitro* conditions (n.a: not applicable).

| Monkey (NK cells): | combined with | Supernatant from monkey: |
|--------------------|---------------|--------------------------|
| AGM14              | ->            | AGM15                    |
| AGM14              | ->            | AGM18                    |
| AGM17              | ->            | AGM14                    |
| AGM17              | ->            | AGM15                    |
| AGM17              | ->            | AGM18                    |
| AGM18              | ->            | AGM14                    |
| AGM18              | ->            | AGM15                    |

**Table S5. AGM IDs combination between NK and supernatant condition, Related to Figure 3.**

Animals from which supernatants were collected and animals for which fresh NK cells were cultured with the respective supernatants (Figure 3E).

| ID  | Gender |
|-----|--------|
| 745 | Female |
| 746 | Male   |
| 771 | Female |
| 772 | Male   |
| 773 | Female |
| 774 | Female |
| 775 | Female |
| 776 | Female |
| 777 | Female |
| 778 | Female |
| 779 | Male   |
| 780 | Female |
| 781 | Male   |

**Table S6. Blood healthy donor used for this study, Related to Figure 4.** Description of healthy donors according to ID (gender).
